# Supplementary material
Source: publisher figshare collection journal article supplement (https://tandf.figshare.com/articles/dataset/_/6736331)

**Supplementary Figure 1:** Flow chart of patient inclusion in the present study.


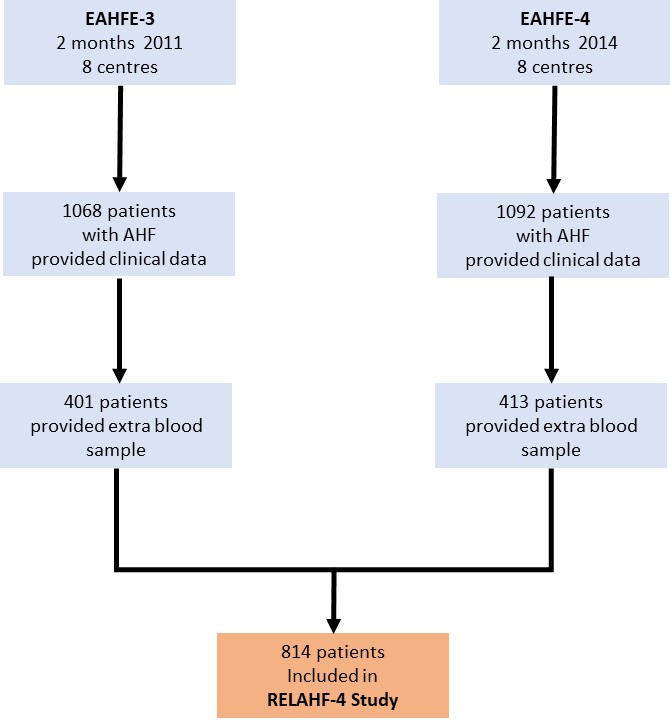

Supplement: Supplementary file 1 [file 1]
